# Supplementary material
Source: MDPI journal article supplement (https://www.mdpi.com/1424-8247/15/11/1383)
Supplement: s1 [file s1]

# Quantitative structure–toxicity relationship in bioactive molecules from a conceptual DFT perspective

Ranita Pal,<sup>1</sup> Shanti Gopal Patra,<sup>2</sup> and Pratim Kumar Chattaraj<sup>2,\*</sup>

<sup>1</sup>Advanced Technology Development Centre, Indian Institute of Technology Kharagpur, 721302, India.

<sup>2</sup>Department of Chemistry, Indian Institute of Technology Kharagpur, West Bengal - 721302, India

\* Corresponding author: [pkc@chem.iitkgp.ac.in](mailto:pkc@chem.iitkgp.ac.in) (PKC) (ORCID; 0000-0002-5650-7666)

## SUPPLEMENTARY INFORMATION

**Table S1:** Polychlorinated dibenzofurans with identity number (ID) representing the substitution pattern. (reprinted from ref. [77] with permission from Springer Nature. Copyright © 2006, Springer Science Business Media, Inc.)

| 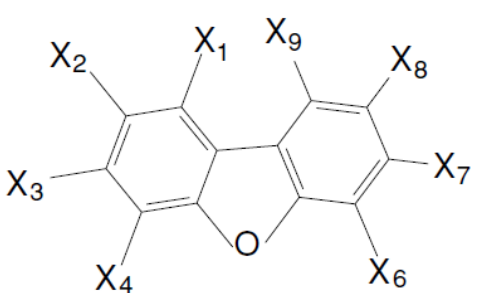 |                |                |                |                |                |                |                |                |
|--------------------------------------------------------------------------------------|----------------|----------------|----------------|----------------|----------------|----------------|----------------|----------------|
| ID                                                                                   | X <sub>1</sub> | X <sub>2</sub> | X <sub>3</sub> | X <sub>4</sub> | X <sub>5</sub> | X <sub>6</sub> | X <sub>7</sub> | X <sub>8</sub> |
| 1                                                                                    | H              | Cl             | H              | H              | H              | H              | H              | H              |
| 2                                                                                    | H              | H              | H              | Cl             | H              | H              | H              | H              |
| 3                                                                                    | H              | Cl             | H              | H              | Cl             | H              | H              | H              |
| 4                                                                                    | H              | Cl             | H              | H              | H              | H              | Cl             | H              |
| 5                                                                                    | Cl             | H              | Cl             | H              | Cl             | H              | H              | H              |
| 6                                                                                    | Cl             | H              | Cl             | H              | H              | H              | Cl             | H              |
| 7                                                                                    | H              | Cl             | Cl             | Cl             | H              | H              | H              | H              |
| 8                                                                                    | H              | Cl             | Cl             | H              | H              | H              | Cl             | H              |
| 9                                                                                    | H              | Cl             | H              | H              | Cl             | Cl             | H              | H              |
| 10                                                                                   | H              | Cl             | Cl             | Cl             | Cl             | H              | H              | H              |
| 11                                                                                   | H              | Cl             | Cl             | Cl             | H              | H              | Cl             | H              |
| 12                                                                                   | H              | Cl             | Cl             | H              | H              | Cl             | Cl             | H              |
| 13                                                                                   | Cl             | Cl             | H              | Cl             | Cl             | Cl             | H              | H              |
| 14                                                                                   | Cl             | Cl             | Cl             | Cl             | H              | H              | Cl             | H              |
| 15                                                                                   | Cl             | Cl             | Cl             | H              | H              | Cl             | Cl             | H              |
| 16                                                                                   | H              | Cl             | Cl             | Cl             | H              | Cl             | Cl             | H              |

|    |    |    |    |    |    |    |    |    |
|----|----|----|----|----|----|----|----|----|
| 17 | Cl | Cl | Cl | Cl | H  | Cl | Cl | H  |
| 18 | H  | Cl | Cl | Cl | Cl | Cl | Cl | H  |
| 19 | H  | Cl | Cl | H  | Cl | H  | Cl | H  |
| 20 | Cl | Cl | Cl | H  | Cl | H  | H  | H  |
| 21 | Cl | Cl | Cl | H  | H  | Cl | H  | H  |
| 22 | Cl | H  | Cl | Cl | H  | Cl | Cl | H  |
| 23 | H  | Cl | Cl | Cl | H  | Cl | H  | Cl |
| 24 | Cl | Cl | Cl | H  | H  | Cl | H  | Cl |
| 25 | Cl | Cl | Cl | H  | H  | Cl | H  | H  |
| 26 | Cl | H  | Cl | Cl | H  | Cl | Cl | H  |
| 27 | H  | Cl | Cl | Cl | H  | Cl | H  | Cl |

**Table S2:** Polychlorinated biphenyls with identity number (ID) representing the substitution pattern. (reprinted from ref. [77] with permission from Springer Nature. Copyright © 2006, Springer Science Business Media, Inc.)

| 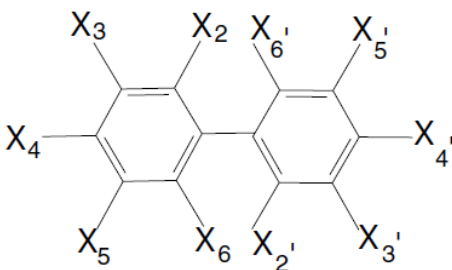 |                |                |                |                |                |                 |                 |                 |                 |                 |
|-------------------------------------------------------------------------------------|----------------|----------------|----------------|----------------|----------------|-----------------|-----------------|-----------------|-----------------|-----------------|
| ID                                                                                  | X <sub>2</sub> | X <sub>3</sub> | X <sub>4</sub> | X <sub>5</sub> | X <sub>6</sub> | X <sub>2'</sub> | X <sub>3'</sub> | X <sub>4'</sub> | X <sub>5'</sub> | X <sub>6'</sub> |
| 28                                                                                  | Cl             | H              | H              | H              | H              | H               | Cl              | Cl              | Cl              | H               |
| 29                                                                                  | Cl             | Cl             | Cl             | H              | H              | H               | Cl              | Cl              | H               | H               |
| 30                                                                                  | Cl             | H              | Cl             | Cl             | H              | H               | Cl              | Cl              | H               | H               |
| 31                                                                                  | Cl             | Cl             | Cl             | Cl             | H              | H               | Cl              | Cl              | H               | H               |
| 32                                                                                  | Cl             | H              | Cl             | H              | H              | Cl              | H               | Cl              | H               | H               |
| 33                                                                                  | Cl             | H              | Cl             | H              | Cl             | H               | Cl              | Cl              | Cl              | H               |

**Table S3:** Dataset of 252 aliphatic compounds considered against *Tetrahymena pyriformis*. [78]

| <i>Alcohols: amino alcohols</i> |                                     | <i>Saturated alcohols</i>   |                                 | 23                             | 1-Hexen-3-ol                   |
|---------------------------------|-------------------------------------|-----------------------------|---------------------------------|--------------------------------|--------------------------------|
| 1                               | 2-(Methylamino)ethanol              | 1                           | Methyl alcohol                  | 24                             | <i>cis</i> -2-Hexen-1-ol       |
| 2                               | 4-Amino-1-butanol                   | 2                           | Ethyl alcohol                   | 25                             | <i>trans</i> -2-Octen-1-ol     |
| 3                               | 2-(Ethylamino)ethanol               | 3                           | 1-Propanol                      | <i>Acids: carboxylic acids</i> |                                |
| 4                               | 2-Propylaminoethanol                | 4                           | 2-Propanol                      | 1                              | Propanoic acid                 |
| 5                               | DL-2-Amino-1-pentanol               | 5                           | 1-Butanol                       | 2                              | Butyric acid                   |
| 6                               | 3-Amino-2,2-dimethyl-1-propanol     | 6                           | (±)-2-Butanol                   | 3                              | Valeric acid                   |
| 7                               | 6-Amino-1-hexanol                   | 7                           | 2-Methyl-1-propanol             | 4                              | Hexanoic acid                  |
| 8                               | DL-2-Amino-1-hexanol                | 8                           | 2-Pentanol                      | 5                              | Heptanoic acid                 |
| 9                               | DL-2-Amino-3-methyl-1-butanol       | 9                           | 3-Pentanol                      | 6                              | Octanoic acid                  |
| 10                              | 2-Amino-3,3-dimethyl-butanol        | 10                          | 3-Methyl-2-butanol              | 7                              | Nonanoic acid                  |
| 11                              | 2-Amino-3-methyl-1-pentanol         | 11                          | tert-Amyl alcohol               | 8                              | Decanoic acid                  |
| 12                              | 2-Amino-4-methyl-pentanol           | 12                          | 2-Methyl-1-butanol              | 9                              | Undecanoic acid                |
| 13                              | 2-( <i>tert</i> -Butylamino)ethanol | 13                          | 3-Methyl-1-butanol              | 10                             | <i>iso</i> -Butyric acid       |
| 14                              | Diethanolamine                      | 14                          | 2,2-Dimethyl-1-propanol         | 11                             | Isovaleric acid                |
| 15                              | 1,3-Diamino-2-hydroxy-propane       | 15                          | 2-Methyl-2-propanol             | 12                             | Trimethylacetic acid           |
| 16                              | <i>N</i> -Methyldiethanol amine     | 16                          | 1-Hexanol                       | 13                             | 3-Methylvaleric acid           |
| 17                              | 3-(Methylamino)-1,2-propanediol     | 17                          | 3,3-Dimethyl-1-butanol          | 14                             | 4-Methylvaleric acid           |
| 18                              | Triethanolamine                     | 18                          | 4-Methyl-1-pentanol             | 15                             | 2-Ethylbutyric acid            |
| <i>α-Acetylenic alcohols</i>    |                                     | 19                          | 1-Heptanol                      | 16                             | 2-Propylpentanoic acid         |
| 1                               | 3-Butyn-2-ol                        | 20                          | 2,4-Dimethyl-3-pentanol         | 17                             | 2-Ethylhexanoic acid           |
| 2                               | 1-Pentyn-3-ol                       | 21                          | 1-Octanol                       | 18                             | Succinic acid                  |
| 3                               | 2-Pentyn-1-ol                       | 22                          | 2-Octanol                       | 19                             | Glutaric acid                  |
| 4                               | 2-Penten-4-yn-1-ol                  | 23                          | 3-Octanol                       | 20                             | Adipic acid                    |
| 5                               | 1-Hexyn-3-ol                        | 24                          | 1-Nonanol                       | 21                             | Pimelic acid                   |
| 6                               | 1-Heptyn-3-ol                       | 25                          | 2-Nonanol                       | 22                             | 3,3-Dimethylglutaric acid      |
| 7                               | 4-Heptyn-3-ol                       | 26                          | 3-Ethyl-2,2-dimethyl-3-pentanol | 23                             | Suberic acid                   |
| 8                               | 2-Octyn-1-ol                        | 27                          | 1-Decanol                       | 24                             | Sebacic acid                   |
| 9                               | 2-Nonyn-1-ol                        | 28                          | (±)-4-Decanol                   | 25                             | 1,10-Decanedicarboxylic acid   |
| 10                              | 2-Decyn-1-ol                        | 29                          | 3,7-Dimethyl-3-octanol          | 26                             | Crotonic acid                  |
| 11                              | 2-Tridecyn-1-ol                     | 30                          | 1-Undecanol                     | 27                             | <i>trans</i> -2-Pentenoic acid |
| 12                              | 4-Methyl-1-pentyn-3-ol              | 31                          | 1-Dodecanol                     | 28                             | <i>trans</i> -2-Hexenoic acid  |
| 13                              | 4-Methyl-1-heptyn-3-ol              | 32                          | 1-Tridecanol                    | <i>Halogenated acids</i>       |                                |
| <i>Diols</i>                    |                                     | <i>Unsaturated alcohols</i> |                                 | 1                              | 4-Bromobutyric acid            |
| 1                               | (±)-1,2-Butanediol                  | 1                           | 2-Methyl-3-buten-2-ol           | 2                              | 5-Bromovaleric acid            |
| 2                               | (±)-1,3-Butanediol                  | 2                           | 4-Pentyn-1-ol                   | 3                              | 4-Chlorobutyric acid           |
| 3                               | 1,4-Butanediol                      | 3                           | 2-Methyl-3-butyne-2-ol          | 4                              | 3-Chloropropionic acid         |
| 4                               | 1,2-Pentanediol                     | 4                           | <i>trans</i> -3-Hexen-1-ol      | 5                              | 5-Chlorovaleric acid           |
| 5                               | 1,5-Pentanediol                     | 5                           | <i>cis</i> -3-Hexen-1-ol        | 6                              | 2-Bromobutyric acid            |
| 6                               | 2-Methyl-2,4-pentanediol            | 6                           | 5-Hexyn-1-ol                    | 7                              | 2-Bromoisobutyric acid         |
| 7                               | (±)-1,2-Hexanediol                  | 7                           | 3-Methyl-1-pentyn-3-ol          | 8                              | 2-Bromoisovaleric acid         |
| 8                               | 1,6-Hexanediol                      | 8                           | 4-Hexen-1-ol                    | 9                              | 2-Bromovaleric acid            |
| 9                               | 1,2-Decanediol                      | 9                           | 5-Hexen-1-ol                    | 10                             | 2-Bromooctanoic acid           |
| 10                              | 1,10-Decanediol                     | 10                          | 4-Pentyn-2-ol                   | 11                             | 2-Bromohexanoic acid           |
| <i>Halogenated alcohols</i>     |                                     | 11                          | 5-Hexyn-3-ol                    | <i>Esters: monoesters</i>      |                                |
| 1                               | 2-Bromoethanol                      | 12                          | 3-Heptyn-1-ol                   | 1                              | Ethyl acetate                  |
| 2                               | 2-Chloroethanol                     | 13                          | 4-Heptyn-2-ol                   | 2                              | Propyl acetate                 |
| 3                               | 1-Chloro-2-propanol                 | 14                          | 3-Octyn-1-ol                    | 3                              | Isopropyl acetate              |
| 4                               | 3-Chloro-1-propanol                 | 15                          | 3-Nonyn-1-ol                    | 4                              | Butyl acetate                  |
| 5                               | 4-Chloro-1-butanol                  | 16                          | 2-Propen-1-ol                   | 5                              | Amyl acetate                   |
| 6                               | 3-Chloro-2,2-dimethyl-1-propanol    | 17                          | 2-Buten-1-ol                    | 6                              | Hexyl acetate                  |
| 7                               | 6-Chloro-1-hexanol                  | 18                          | (±)-3-Buten-2-ol                | 7                              | Octyl acetate                  |
| 8                               | 8-Chloro-1-octanol                  | 19                          | <i>cis</i> -2-Buten-1,4-diol    | 8                              | Decyl acetate                  |
| 9                               | 6-Bromo-1-hexanol                   | 20                          | <i>cis</i> -2-Penten-1-ol       | 9                              | Ethyl propionate               |
| 10                              | 8-Bromo-1-octanol                   | 21                          | 3-Penten-2-ol                   | 10                             | Butyl propionate               |
| 11                              | 2,3-Dibromopropanol                 | 22                          | <i>trans</i> -2-Hexen-1-ol      | 11                             | Isobutyl propionate            |

(Table S3 continued...)

|                                              |                               |                      |                                |
|----------------------------------------------|-------------------------------|----------------------|--------------------------------|
| <b><i>Esters: monoesters (continued)</i></b> |                               | 10                   | 2-Nonanone                     |
| 12                                           | Propyl propionate             | 11                   | 2-Decanone                     |
| 13                                           | <i>tert</i> -Butyl propionate | 12                   | 3-Decanone                     |
| 14                                           | Ethyl butyrate                | 13                   | 2-Undecanone                   |
| 15                                           | Ethyl isobutyrate             | 14                   | 2-Dodecanone                   |
| 16                                           | Ethyl valerate                | 15                   | 7-Tridecanone                  |
| 17                                           | Propyl butyrate               | <b><i>Amines</i></b> |                                |
| 18                                           | Butyl butyrate                | 1                    | Propylamine                    |
| 19                                           | Propyl valerate               | 2                    | Butylamine                     |
| 20                                           | Amyl propionate               | 3                    | <i>N</i> -Methylpropylamine    |
| 21                                           | Ethyl hexanoate               | 4                    | Amylamine                      |
| 22                                           | Methyl butyrate               | 5                    | <i>N</i> -Methylbutylamine     |
| 23                                           | Methyl valerate               | 6                    | Hexylamine                     |
| 24                                           | Methyl hexanoate              | 7                    | Isopropylamine                 |
| 25                                           | Methyl heptanoate             | 8                    | Isobutylamine                  |
| 26                                           | Methyl octanoate              | 9                    | <i>N,N</i> -Dimethylethylamine |
| 27                                           | Methyl nonanoate              | 10                   | (±)- <i>sec</i> -Butylamine    |
| 28                                           | Methyl decanoate              | 11                   | Isoamylamine                   |
| 29                                           | Methyl undecanoate            | 12                   | 1-Methylbutylamine             |
| 30                                           | Methyl formate                | 13                   | 1-Ethylpropylamine             |
| 31                                           | <i>tert</i> -Butyl formate    | 14                   | 2-Methylbutylamine             |
| <b><i>Diesters</i></b>                       |                               | 15                   | <i>N,N</i> -Diethylmethylamine |
| 1                                            | Diethyl malonate              | 16                   | <i>tert</i> -Butylamine        |
| 2                                            | Diethyl sebacate              | 17                   | <i>tert</i> -Amylamine         |
| 3                                            | Diethyl suberate              | 18                   | (±)-1,2-Dimethylpropylamine    |
| 4                                            | Diethyl succinate             | 19                   | Propargylamine                 |
| 5                                            | Dimethyl malonate             | 20                   | <i>N</i> -Methylpropargylamine |
| 6                                            | Dibutyl adipate               | 21                   | 1-Dimethylamino-2-propyne      |
| 7                                            | Dimethyl succinate            | 22                   | 1,1-Dimethylpropargylamine     |
| 8                                            | Diethyl adipate               | 23                   | 2-Methoxyethylamine            |
| 9                                            | Dimethyl brassylate           | 24                   | 3-Methoxypropylamine           |
| 10                                           | Dimethyl sebacate             | 25                   | 3-Ethoxypropylamine            |
| 11                                           | Dimethyl suberate             |                      |                                |
| 12                                           | Diethyl pimelate              |                      |                                |
| 13                                           | Dibutyl suberate              |                      |                                |
| 14                                           | Diethyl butylmalonate         |                      |                                |
| 15                                           | Diethyl ethylmalonate         |                      |                                |
| 16                                           | Diethyl 3-oxopimelate         |                      |                                |
| 17                                           | Diethyl 4-oxopimelate         |                      |                                |
| 18                                           | Diethyl methylmalonate        |                      |                                |
| 19                                           | Diethyl propylmalonate        |                      |                                |
| 20                                           | Dibutyl succinate             |                      |                                |
| <b><i>Aldehydes</i></b>                      |                               |                      |                                |
| 1                                            | Propionaldehyde               |                      |                                |
| 2                                            | Butyraldehyde                 |                      |                                |
| 3                                            | Isobutyraldehyde              |                      |                                |
| 4                                            | Valeraldehyde                 |                      |                                |
| 5                                            | 2-Methyl-butyraldehyde        |                      |                                |
| 6                                            | Hexylaldehyde                 |                      |                                |
| 7                                            | 2-Methylvaleraldehyde         |                      |                                |
| 8                                            | 2-Ethylbutyraldehyde          |                      |                                |
| 9                                            | 3,3-Dimethylbutyraldehyde     |                      |                                |
| 10                                           | Heptaldehyde                  |                      |                                |
| 11                                           | 2-Ethylhexanal                |                      |                                |
| 12                                           | <i>trans</i> -4-Decen-1-al    |                      |                                |
| 13                                           | <i>cis</i> -7-Decen-1-al      |                      |                                |
| <b><i>Ketones</i></b>                        |                               |                      |                                |
| 1                                            | Acetone                       |                      |                                |
| 2                                            | 2-Butanone                    |                      |                                |
| 3                                            | 2-Pentanone                   |                      |                                |
| 4                                            | 3-Pentanone                   |                      |                                |
| 5                                            | 4-Methyl-2-pentanone          |                      |                                |
| 6                                            | 2-Heptanone                   |                      |                                |
| 7                                            | 5-Methyl-2-hexanone           |                      |                                |
| 8                                            | 4-Heptanone                   |                      |                                |
| 9                                            | 2-Octanone                    |                      |                                |

**Table S4:** The dataset of 32 pyridyl benzamides considered against *Trypanosoma brucei* (reprinted from Ref. [79]. © 2019, IGI Global)

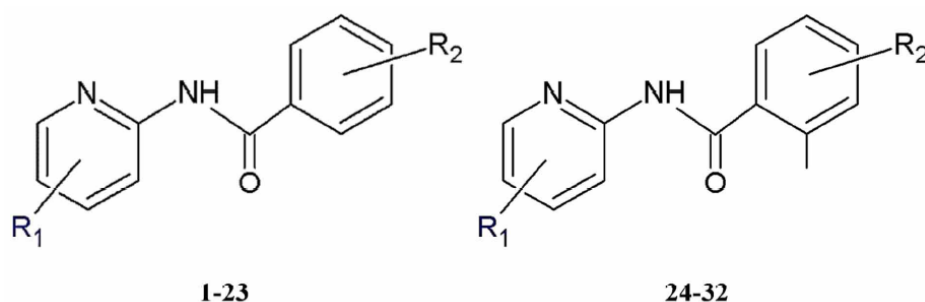

| Sl. No. | R <sub>1</sub>                                         | R <sub>2</sub> | Expt. pIC <sub>50</sub> | $\omega$ | $\omega^2$ |
|---------|--------------------------------------------------------|----------------|-------------------------|----------|------------|
| 1       | H                                                      | 2-Me           | 5.5190                  | 0.37     | 0.14       |
| 2       | 4-CN                                                   | 2-Me           | 5.6380                  | 0.60     | 0.36       |
| 3       | 4-Me                                                   | 2-Me           | 5.6780                  | 0.36     | 0.13       |
| 4       | 4-Cl                                                   | 2-Me           | 5.6780                  | 0.44     | 0.19       |
| 5       | 4-Br                                                   | 2-Me           | 5.7450                  | 0.44     | 0.19       |
| 6       | 4-F                                                    | 2-Me           | 6.2920                  | 0.43     | 0.18       |
| 7       | 4-C≡CPh                                                | 2-Me           | 5.7700                  | 0.47     | 0.22       |
| 8       | 4-C≡CCH <sub>2</sub> -iPr                              | 2-Me           | 5.9590                  | 0.40     | 0.16       |
| 9       | 4-Ph                                                   | 2-Me           | 5.6990                  | 0.40     | 0.16       |
| 10      | 5-OMe                                                  | 2-Me           | 5.4200                  | 0.35     | 0.12       |
| 11      | 6-CH=CH(CH <sub>2</sub> ) <sub>2</sub> CH <sub>3</sub> | 2-Me           | 5.2220                  | 0.31     | 0.10       |
| 12      | 6-NH <sub>2</sub>                                      | 2-Me           | 5.3370                  | 0.30     | 0.09       |
| 13      | H                                                      | H              | 5.0420                  | 0.40     | 0.16       |
| 14      | H                                                      | 2-Et           | 5.5620                  | 0.36     | 0.13       |
| 15      | H                                                      | 2-Me, 3-F      | 6.0510                  | 0.41     | 0.17       |
| 16      | H                                                      | 3-F            | 5.1350                  | 0.46     | 0.21       |
| 17      | H                                                      | 2-Me, 3-Cl     | 6.2010                  | 0.40     | 0.16       |
| 18      | H                                                      | 2-Me, 3-Br     | 5.2440                  | 0.41     | 0.16       |
| 19      | H                                                      | 2,3-diMe       | 5.4560                  | 0.34     | 0.11       |
| 20      | H                                                      | 2-Me, 4-F      | 5.7210                  | 0.38     | 0.15       |
| 21      | H                                                      | 2-Me, 4-Cl     | 5.9590                  | 0.43     | 0.19       |
| 22      | H                                                      | 2-Me, 4-Br     | 5.9590                  | 0.44     | 0.19       |
| 23      | H                                                      | 2,4-diMe       | 6.0090                  | 0.36     | 0.13       |
| 24      | H                                                      | 3-F, 4-F       | 6.3870                  | 0.47     | 0.22       |
| 25      | 4-Me                                                   | 3-F            | 6.0810                  | 0.48     | 0.23       |
| 26      | 4-Me                                                   | 3-F, 4-F       | 6.0460                  | 0.46     | 0.21       |
| 27      | 4-Cl                                                   | 3-F            | 6.3280                  | 0.53     | 0.28       |
| 28      | 4-Cl                                                   | 3-F, 4-F       | 6.2760                  | 0.54     | 0.30       |
| 29      | 4-F                                                    | 3-F            | 7.0000                  | 0.52     | 0.27       |
| 30      | 4-F                                                    | 3-F, 4-F       | 6.7210                  | 0.53     | 0.29       |
| 31      | 5-OMe                                                  | 3-F            | 5.6380                  | 0.43     | 0.19       |
| 32      | 5-OMe                                                  | 4-F            | 5.5850                  | 0.39     | 0.15       |
